# Supplementary material for: Reliability of self-reported risk factors for age-related brain disease
Source: bioRxiv or medRxiv preprint supplement (doi:10.1101/2024.04.25.24306370), 2024-04-26
Supplement: Supplementary file [file media-1.pdf]

**Supplementary Materials****Page**

Supplementary Tables:

|                               |          |
|-------------------------------|----------|
| <u>Supplementary Table 1.</u> | <u>2</u> |
| <u>Supplementary Table 2.</u> | <u>3</u> |
| <u>Supplementary Table 3.</u> | <u>4</u> |
| <u>Supplementary Table 4.</u> | <u>5</u> |
| <u>Supplementary Table 5.</u> | <u>6</u> |
| <u>Supplementary Table 6.</u> | <u>7</u> |

Supplementary Figures:

|                                |           |
|--------------------------------|-----------|
| <u>Supplementary Figure 1.</u> | <u>8</u>  |
| <u>Supplementary Figure 2.</u> | <u>9</u>  |
| <u>Supplementary Figure 3.</u> | <u>10</u> |
| <u>Supplementary Figure 4.</u> | <u>11</u> |
| <u>Supplementary Figure 5.</u> | <u>12</u> |
| <u>Supplementary Figure 6.</u> | <u>13</u> |
| <u>Supplementary Figure 7.</u> | <u>14</u> |

**Supplementary Table 1.**

| Question                                                                                                            | Age           | Female          | Race             |                |                 |                 |                |
|---------------------------------------------------------------------------------------------------------------------|---------------|-----------------|------------------|----------------|-----------------|-----------------|----------------|
|                                                                                                                     |               |                 | Mexican American | Other Hispanic | White           | Black           | Other          |
| <b>Blood Pressure</b>                                                                                               |               |                 |                  |                |                 |                 |                |
| Has a doctor ever told you you had high blood pressure?                                                             | 44<br>(16-85) | 29,465<br>(51%) | 10,821<br>(19%)  | 4,594<br>(8%)  | 24,166<br>(42%) | 12,646<br>(22%) | 5,225<br>(9%)  |
| Has a doctor ever told you >1 you had high blood pressure?                                                          | 44<br>(16-85) | 29,434<br>(51%) | 10,809<br>(19%)  | 4,592<br>(8%)  | 24,127<br>(42%) | 12,632<br>(22%) | 5,217<br>(9%)  |
| Have you ever been prescribed antihypertensive medication?                                                          | 44<br>(16-85) | 29,457<br>(51%) | 10,815<br>(19%)  | 4,594<br>(8%)  | 24,159<br>(42%) | 12,644<br>(22%) | 5,221<br>(9%)  |
| Are you currently taking antihypertensive medication?                                                               | 44<br>(16-85) | 29,456<br>(51%) | 10,815<br>(19%)  | 4,594<br>(8%)  | 24,155<br>(42%) | 12,644<br>(22%) | 5,221<br>(9%)  |
| <b>Cholesterol</b>                                                                                                  |               |                 |                  |                |                 |                 |                |
| Has a doctor ever told you you had high cholesterol?                                                                | 51<br>(16-85) | 21,776<br>(52%) | 6,303<br>(15%)   | 3,504<br>(8%)  | 18,922<br>(46%) | 8,428<br>(20%)  | 4,378<br>(11%) |
| Have you ever been prescribed cholesterol lowering medication?                                                      | 56<br>(16-85) | 12,791<br>(52%) | 3,335<br>(14%)   | 2,181<br>(9%)  | 10,924<br>(45%) | 4,997<br>(21%)  | 2,938<br>(12%) |
| Has a doctor ever told you you had high cholesterol & Are you currently not taking cholesterol lowering medication? | 64<br>(16-85) | 5,109<br>(49%)  | 1,477<br>(14%)   | 940<br>(9%)    | 5201<br>(49%)   | 1,973<br>(19%)  | 922<br>(9%)    |
| Have you ever been prescribed cholesterol-lowering meds & Are you not currently taking it?                          | 64<br>(16-85) | 5,109<br>(49%)  | 1,477<br>(14%)   | 940<br>(9%)    | 5201<br>(49%)   | 1,973<br>(19%)  | 922<br>(9%)    |
| <b>Blood Sugar</b>                                                                                                  |               |                 |                  |                |                 |                 |                |
| Has a doctor ever told you you had diabetes?                                                                        | 39<br>(12-85) | 32,714<br>(51%) | 13,119<br>(21%)  | 5,097<br>(8%)  | 25,754<br>(40%) | 14,156<br>(22%) | 5,708<br>(9%)  |
| Are you currently taking insulin?                                                                                   | 40<br>(12-85) | 32,711<br>(51%) | 13,118<br>(21%)  | 5,097<br>(8%)  | 25,750<br>(40%) | 14,155<br>(22%) | 5,708<br>(9%)  |
| Are you currently taking diabetic pills to lower your blood sugar?                                                  | 39<br>(12-85) | 32,706<br>(51%) | 13,113<br>(21%)  | 5,096<br>(8%)  | 25,748<br>(40%) | 14,153<br>(22%) | 5,707<br>(9%)  |

Demographics of included participants. Age is shown as median (range), other variables as number (percentage). “Other” race includes multi-racial.

**Supplementary table 2.**

| <b>Blood pressure</b>                                                                                               |           |         |        |                       |                      |                     |                    |
|---------------------------------------------------------------------------------------------------------------------|-----------|---------|--------|-----------------------|----------------------|---------------------|--------------------|
| Question                                                                                                            | N (total) | N (Yes) | N (No) | Mean SBP “Yes” (SD)   | Mean SBP “No” (SD)   | Mean DBP “Yes” (SD) | Mean DBP “No” (SD) |
| Has a doctor ever told you you had high blood pressure?                                                             | 57452     | 17601   | 39851  | 135 (21.3)*           | 118 (15.8)           | 71.3 (15.7)*        | 68.1 (12.2)        |
| Has a doctor ever told you >1 you had high blood pressure?                                                          | 57377     | 14201   | 43176  | 136 (21.6)*           | 119 (16.5)           | 71.4 (15.8)*        | 68.3 (12.5)        |
| Have you ever been prescribed antihypertensive medication?                                                          | 57433     | 14927   | 42506  | 136 (21.5)*           | 119 (16.2)           | 70.9 (16.0)*        | 68.4 (12.4)        |
| Are you currently taking antihypertensive medication?                                                               | 57429     | 13025   | 44404  | 136 (21.4)*           | 120 (17.0)           | 70.0 (15.8) †       | 68.8 (12.7)        |
| <b>Cholesterol</b>                                                                                                  |           |         |        |                       |                      |                     |                    |
| Question                                                                                                            | N (total) | N (Yes) | N (No) | Mean TC “Yes” (SD)    | Mean TC “No” (SD)    |                     |                    |
| Has a doctor ever told you you had high cholesterol?                                                                | 41535     | 15400   | 26135  | 205 (47.5)*           | 188 (38.9)           |                     |                    |
| Have you ever been prescribed cholesterol lowering medication?                                                      | 24375     | 10526   | 13849  | 196 (48.9) †          | 200 (41.9)           |                     |                    |
| Has a doctor ever told you you had high cholesterol & Are you currently not taking cholesterol lowering medication? | 10513     | 2110    | 8403   | 232 (50.7)*           | 186 (43.9)           |                     |                    |
| Have you ever been prescribed cholesterol-lowering meds & Are you not currently taking it?                          | 10513     | 2287    | 8226   | 230 (50.5)*           | 186 (43.9)           |                     |                    |
| <b>Blood Sugar</b>                                                                                                  |           |         |        |                       |                      |                     |                    |
| Question                                                                                                            | N (total) | N (Yes) | N (No) | Mean HbA1c “Yes” (SD) | Mean HbA1c “No” (SD) |                     |                    |
| Has a doctor ever told you you had diabetes?                                                                        | 63834     | 6124    | 57710  | 7.46 (1.83)*          | 5.39 (0.57)          |                     |                    |
| Are you currently taking insulin?                                                                                   | 63158     | 1722    | 62106  | 8.25 (1.91)*          | 5.52 (0.85)          |                     |                    |
| Are you currently taking diabetic pills to lower your blood sugar?                                                  | 63817     | 4497    | 59320  | 7.41 (1.69)*          | 5.46 (0.75)          |                     |                    |

Differences in blood pressure, cholesterol and blood sugar measurements between participants answering “Yes” or “No” for specific questions for blood pressure. Significance level from independent t-test are shown (\* $p < 5 \times 10^{-16}$ , † $p < 5 \times 10^{-6}$ ,  $p < 5 \times 10^{-4}$ ). Legend: SBP: Systolic Blood Pressure; DBP: Diastolic Blood Pressure; TC: Total Cholesterol; HbA1c: Hemoglobin A1c; SD: Standard Deviation.

**Supplementary table 3.**

| <b>Blood pressure (weighted)</b>                                                                                    |           |         |        |                       |                      |                     |                    |
|---------------------------------------------------------------------------------------------------------------------|-----------|---------|--------|-----------------------|----------------------|---------------------|--------------------|
| Question                                                                                                            | N (total) | N (Yes) | N (No) | Mean SBP “Yes” (SD)   | Mean SBP “No” (SD)   | Mean DBP “Yes” (SD) | Mean DBP “No” (SD) |
| Has a doctor ever told you you had high blood pressure?                                                             | 57452     | 17601   | 39851  | 135 (21.3)*           | 118 (15.8)           | 72.4 (14.7)*        | 69.6 (11.4)        |
| Has a doctor ever told you >1 you had high blood pressure?                                                          | 57377     | 14201   | 43176  | 133 (20.1)*           | 118 (15.3)           | 72.5 (14.9)*        | 69.7 (11.6)        |
| Have you ever been prescribed antihypertensive medication?                                                          | 57433     | 14927   | 42506  | 133 (20.3)*           | 118 (15.1)           | 71.9 (15.0)*        | 69.9 (11.5)        |
| Are you currently taking antihypertensive medication?                                                               | 57429     | 13025   | 44404  | 133 (20.2)*           | 119 (15.7)           | 71.0 (14.9)         | 70.2 (11.8)        |
| <b>Cholesterol (weighted)</b>                                                                                       |           |         |        |                       |                      |                     |                    |
| Question                                                                                                            | N (total) | N (Yes) | N (No) | Mean TC “Yes” (SD)    | Mean TC “No” (SD)    |                     |                    |
| Has a doctor ever told you you had high cholesterol?                                                                | 41535     | 15400   | 26135  | 207.9 (47.5)*         | 189.4 (37.7)         |                     |                    |
| Have you ever been prescribed cholesterol lowering medication?                                                      | 24375     | 10526   | 13849  | 197.1 (49.5) †        | 201.7 (41.5)         |                     |                    |
| Has a doctor ever told you you had high cholesterol & Are you currently not taking cholesterol lowering medication? | 10513     | 2110    | 8403   | 235.6 (51.5)*         | 186.8 (43.5)         |                     |                    |
| Have you ever been prescribed cholesterol-lowering meds & Are you not currently taking it?                          | 10513     | 2287    | 8226   | 233.7 (51.2)*         | 186.4 (43.4)         |                     |                    |
| <b>Blood Sugar (Weighted)</b>                                                                                       |           |         |        |                       |                      |                     |                    |
| Question                                                                                                            | N (total) | N (Yes) | N (No) | Mean HbA1c “Yes” (SD) | Mean HbA1c “No” (SD) |                     |                    |
| Has a doctor ever told you you had diabetes?                                                                        | 63834     | 6124    | 57710  | 7.35 (1.74)*          | 5.36 (0.52)          |                     |                    |
| Are you currently taking insulin?                                                                                   | 63158     | 1722    | 62106  | 8.16 (1.83)*          | 5.47 (0.75)          |                     |                    |
| Are you currently taking diabetic pills to lower your blood sugar?                                                  | 63817     | 4497    | 59320  | 7.30 (1.60)*          | 5.41 (0.68)          |                     |                    |

Weighted differences in blood pressure, cholesterol and blood sugar measurements between participants answering “Yes” or “No” for specific questions for blood pressure. Significance level from independent t-test are shown (\* $p < 5 \times 10^{-16}$ , † $p < 5 \times 10^{-6}$ ,  $\hat{p} < 5 \times 10^{-4}$ ). Legend: SBP: Systolic Blood Pressure; DBP: Diastolic Blood Pressure; TC: Total Cholesterol; HbA1c: Hemoglobin A1c; SD: Standard Deviation.

**Supplementary Table 4.**

| Question                                                                                                                                | Age           | Female          | Race             |                |                 |                 |                |
|-----------------------------------------------------------------------------------------------------------------------------------------|---------------|-----------------|------------------|----------------|-----------------|-----------------|----------------|
|                                                                                                                                         |               |                 | Mexican American | Other Hispanic | White           | Black           | Other          |
| <b>Kidney Function</b>                                                                                                                  |               |                 |                  |                |                 |                 |                |
| Has a doctor ever told you you have weak/failing kidneys?                                                                               | 49<br>(20-85) | 23,124<br>(52%) | 7,569<br>(17%)   | 3,780<br>(8%)  | 19,993<br>(45%) | 9,113<br>(20%)  | 4,358<br>(10%) |
| Have you ever had kidney stones?                                                                                                        | 50<br>(20-80) | 16,068<br>(51%) | 4,769<br>(15%)   | 3,291<br>(11%) | 12,875<br>(41%) | 6,426<br>(21%)  | 3,842<br>(12%) |
| <b>Hearing</b>                                                                                                                          |               |                 |                  |                |                 |                 |                |
| Would you say your hearing is excellent, good, that you have a little trouble, moderate trouble, a lot of trouble or that you are deaf? | 32<br>(6-85)  | 8,454<br>(50%)  | 3,018<br>(18%)   | 1,561<br>(9%)  | 6,170<br>(36%)  | 4,089<br>(24%)  | 2,128<br>(13%) |
| <b>Body Mass Index</b>                                                                                                                  |               |                 |                  |                |                 |                 |                |
| Do you consider yourself to be overweight?                                                                                              | 44<br>(16-85) | 30,495<br>(51%) | 11,244<br>(19%)  | 4,756<br>(8%)  | 24,656<br>(42%) | 13,110<br>(22%) | 5,475<br>(9%)  |
| Would you like to weigh less?                                                                                                           | 44<br>(16-85) | 30,536<br>(51%) | 11,290<br>(19%)  | 4,772<br>(8%)  | 24,658<br>(42%) | 13,115<br>(22%) | 5,484<br>(9%)  |
| Do you consider yourself to be overweight & would you like to weigh less?                                                               | 44<br>(16-85) | 30,484<br>(51%) | 11,241<br>(19%)  | 4,753<br>(8%)  | 24,640<br>(42%) | 13,107<br>(22%) | 5,475<br>(9%)  |

Demographics of included participants. Age is shown as median (range), other variables as number (percentage). “Other” race includes multi-racial.

**Supplementary table 5.**

| <b>Kidney Function</b>                                                    |           |         |        |                         |                        |
|---------------------------------------------------------------------------|-----------|---------|--------|-------------------------|------------------------|
| Question                                                                  | N (total) | N (Yes) | N (No) | Mean GFR “Yes” (SD)     | Mean GFR “No” (SD)     |
| Has a doctor ever told you you have weak/failing kidneys?                 | 44813     | 1404    | 43409  | 61.1 (34.2)*            | 90.6 (26.6)            |
| Have you ever had kidney stones?                                          | 31203     | 2962    | 28241  | 83.6 (26.4)*            | 91.1 (26.4)            |
| <b>Hearing</b>                                                            |           |         |        |                         |                        |
| Question                                                                  | N (total) | N (Yes) | N (No) | Mean db loss “Yes” (SD) | Mean db loss “No” (SD) |
| Are you deaf?                                                             | 16966     | 20      | 16946  | 101.0 (15.9)*           | 36.6 (26.3)            |
| ... or do you have a lot of trouble hearing?                              | 16966     | 392     | 16574  | 87.7 (20.5)*            | 35.4 (25.2)            |
| ... or do you have moderate moderate trouble hearing?                     | 16966     | 1111    | 15855  | 79.1 (24.8)*            | 33.7 (23.7)            |
| ... or do you have a little trouble hearing?                              | 16966     | 3027    | 13939  | 65.6 (28.9)*            | 30.4 (21.0)            |
| ... or is your hearing good (not excellent)                               | 16966     | 9545    | 7421   | 44.8 (28.9)*            | 26.2 (17.9)            |
| <b>Body Mass Index</b>                                                    |           |         |        |                         |                        |
| Question                                                                  | N (total) | N (Yes) | N (No) | Mean BMI “Yes” (SD)     | Mean BMI “No” (SD)     |
| Do you consider yourself to be overweight?                                | 59241     | 29341   | 29900  | 32.5 (6.7)*             | 24.5 (4.2)             |
| Would you like to weigh less?                                             | 59319     | 34430   | 19475  | 31.5 (6.8)*             | 24.1 (4.2)             |
| Do you consider yourself to be overweight & would you like to weigh less? | 59216     | 28251   | 30965  | 32.6 (6.7)*             | 24.7 (4.4)             |

Differences in GFR, hearing impairment and BMI between participants answering “Yes” or “No” for specific questions. Significance level from independent t-test are shown (\* $p < 5 \times 10^{-16}$ , † $p < 5 \times 10^{-6}$ , ` $p < 5 \times 10^{-4}$ ). Legend: GFR: Glomerular Filtration Rate; db: decibels; BMI: Body Mass Index; SD: Standard Deviation.

**Supplementary table 6.**

| <b>Kidney Function (Weighted)</b>                                         |           |         |        |                         |                        |
|---------------------------------------------------------------------------|-----------|---------|--------|-------------------------|------------------------|
| Question                                                                  | N (total) | N (Yes) | N (No) | Mean GFR “Yes” (SD)     | Mean GFR “No” (SD)     |
| Has a doctor ever told you you have weak/failing kidneys?                 | 44813     | 1404    | 43409  | 65.0 (32.8)*            | 89.0 (25.0)            |
| Have you ever had kidney stones?                                          | 31203     | 2962    | 28241  | 83.7 (23.8)*            | 90.0 (24.2)            |
| <b>Hearing (Weighted)</b>                                                 |           |         |        |                         |                        |
| Question                                                                  | N (total) | N (Yes) | N (No) | Mean db loss “Yes” (SD) | Mean db loss “No” (SD) |
| Are you deaf?                                                             | 16966     | 20      | 16946  | 101.9 (15.1)*           | 38.0 (25.6)            |
| ... or do you have a lot of trouble hearing?                              | 16966     | 392     | 16574  | 87.6 (20.3)*            | 36.9 (24.6)            |
| ... or do you have moderate moderate trouble hearing?                     | 16966     | 1111    | 15855  | 77.8 (24.0)*            | 35.1 (23.2)            |
| ... or do you have a little trouble hearing?                              | 16966     | 3027    | 13939  | 64.0 (27.6)*            | 31.6 (20.6)            |
| ... or is your hearing good (not excellent)                               | 16966     | 9545    | 7421   | 45.6 (27.6)*            | 27.3 (17.7)            |
| <b>Body Mass Index (Weighted)</b>                                         |           |         |        |                         |                        |
| Question                                                                  | N (total) | N (Yes) | N (No) | Mean BMI “Yes” (SD)     | Mean BMI “No” (SD)     |
| Do you consider yourself to be overweight?                                | 59241     | 29341   | 29900  | 32.1 (6.6)*             | 24.2 (4.0)             |
| Would you like to weigh less?                                             | 59319     | 34430   | 19475  | 31.1 (6.7)*             | 23.9 (4.0)             |
| Do you consider yourself to be overweight & would you like to weigh less? | 59216     | 28251   | 30965  | 32.2 (6.6)*             | 24.4 (4.2)             |

Weighted differences in GFR, hearing impairment and BMI between participants answering “Yes” or “No” for specific questions. Significance level from independent t-test are shown (\* $p < 5 \times 10^{-16}$ , † $p < 5 \times 10^{-6}$ , ‡ $p < 5 \times 10^{-4}$ ). Legend: GFR: Glomerular Filtration Rate; db: decibels; BMI: Body Mass Index; SD: Standard Deviation.

## Supplementary Figure 1

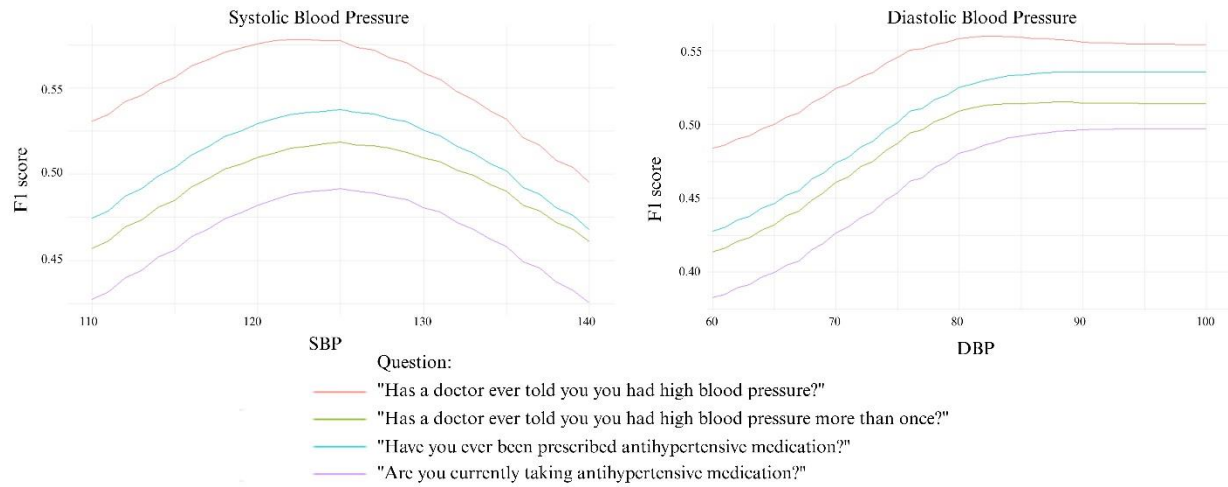

F1 score for different cut-off values of systolic and diastolic blood pressure for common questions.



## Supplementary Figure 2

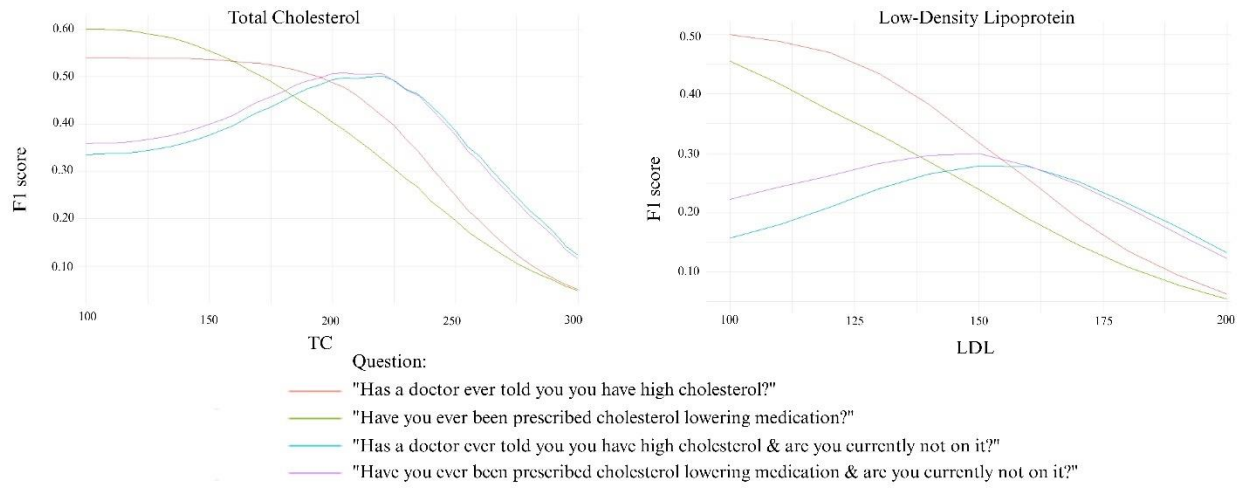

F1 score for different cut-off values of total cholesterol and LDL for common questions.

### Supplementary Figure 3

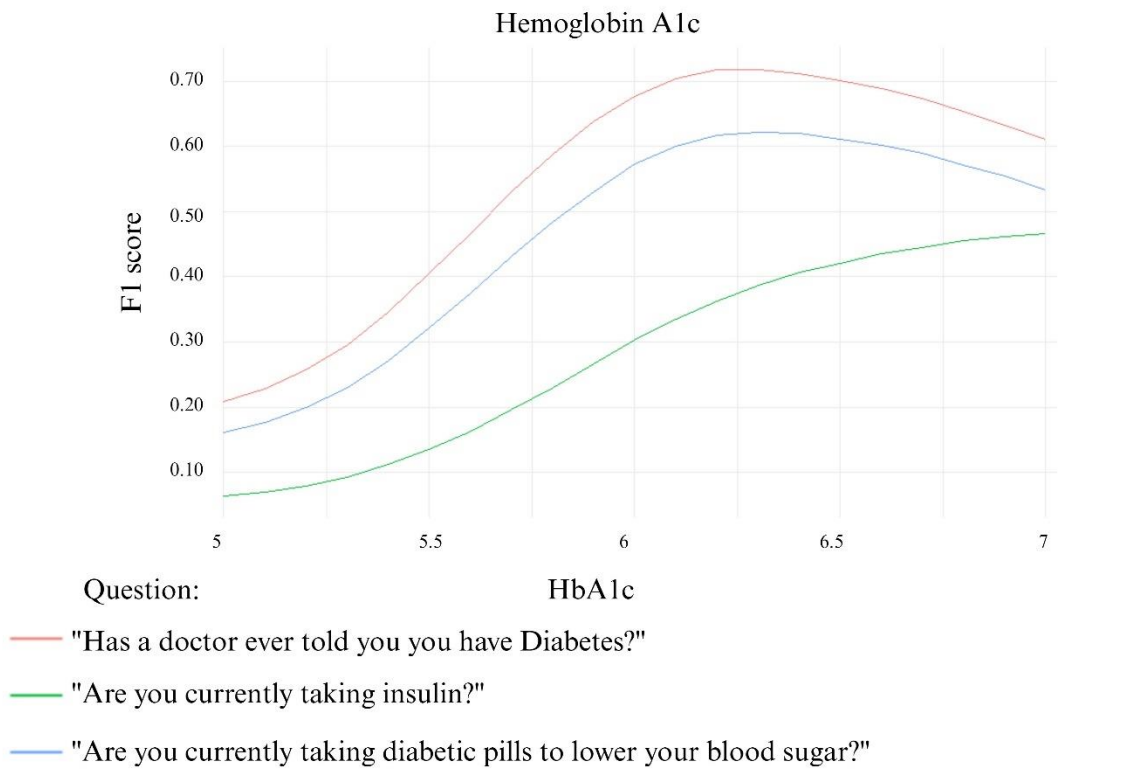

F1 score for different cut-off values of HbA1c for common questions.

### Supplementary Figure 4

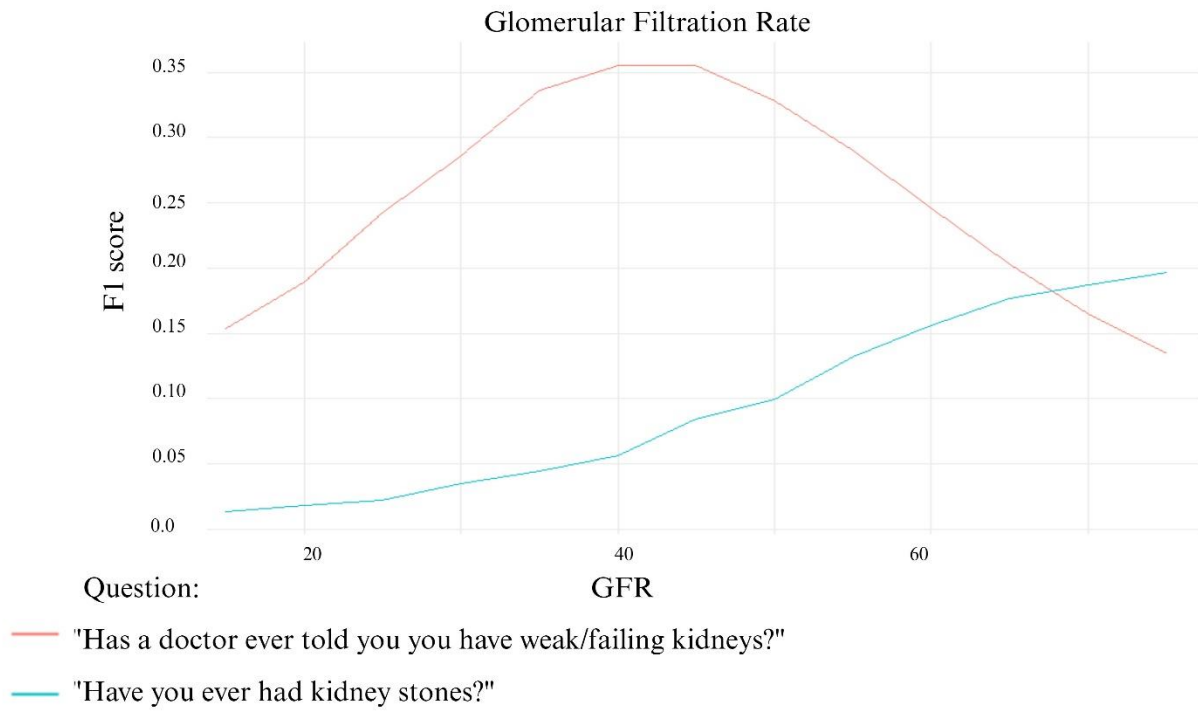

F1 score for different cut-off values of GFR for common questions.

### Supplementary Figure 5

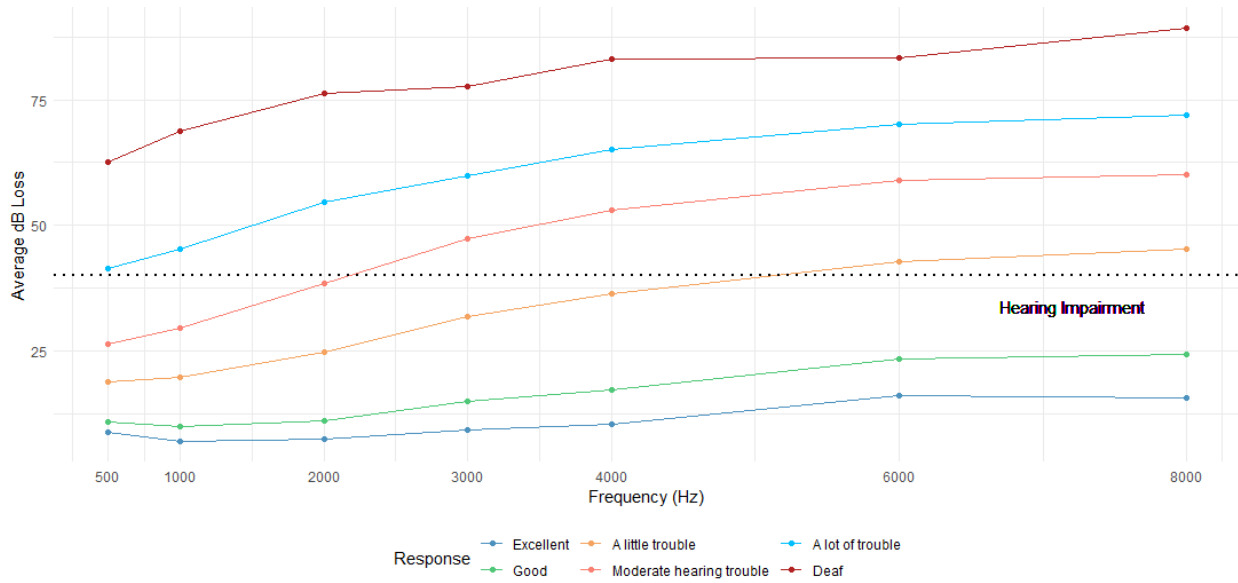

Hearing loss per frequency, stratified by answers. The dotted line represents cut-off value for hearing impairment. Legends: dB: decibel.

Supplementary Figure 6

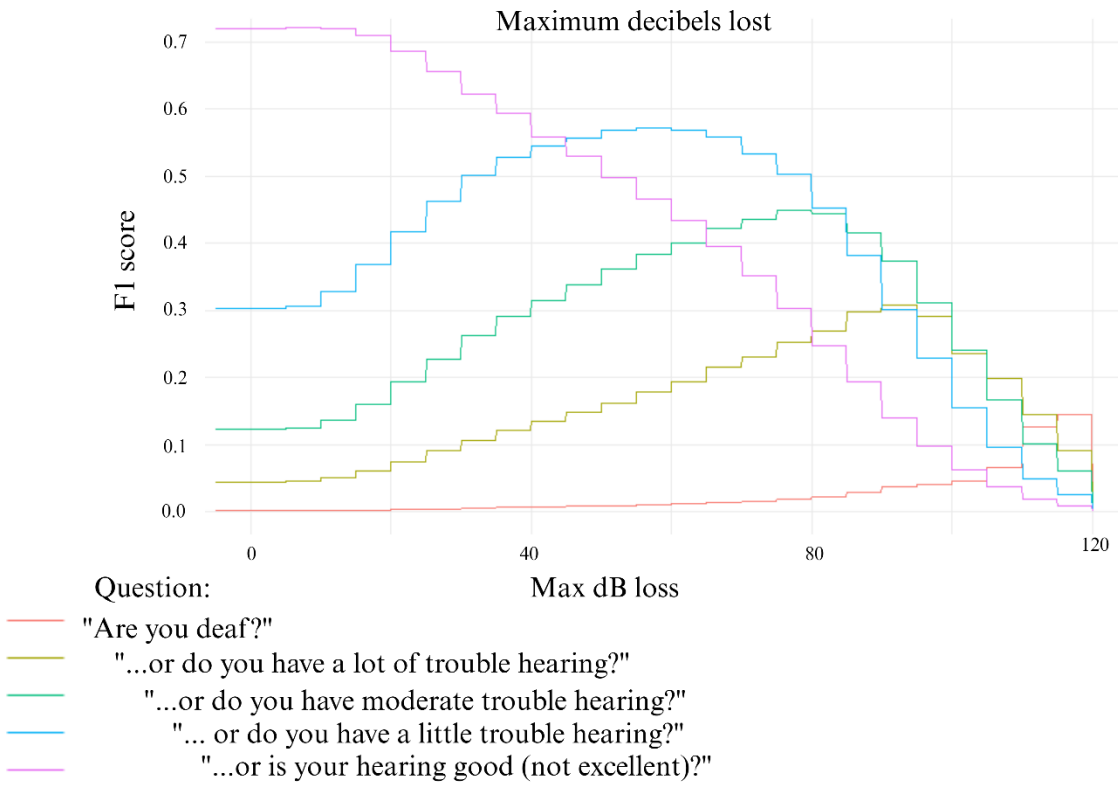

F1 score for different cut-off values of dB loss for common questions.

**Supplementary Figure 7**

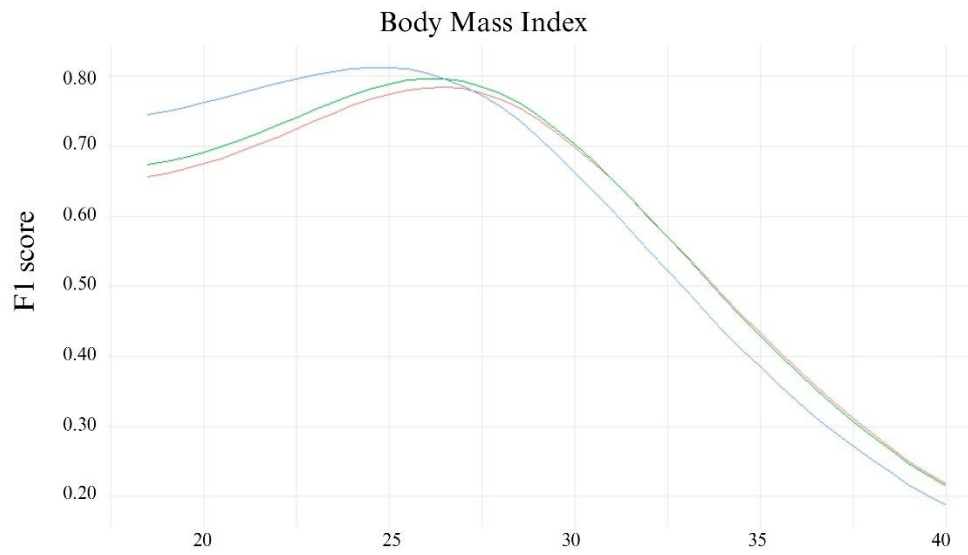

Question: BMI

— "Do you consider yourself to be overweight?"

— "Would you like to weigh less?"

— "Do you consider yourself to be overweight & would you like to weigh less?"

F1 score for different cut-off values of BMI for common questions.
